# Supplementary material for: Pain control post total knee replacement in patients given local infiltrative analgesia combined with adductor canal block compared to either modality alone: a systematic review and meta-analysis
Source: PubMed Central journal article supplement — BMJ Open. 2024 Nov 12;14(11):e080555. doi: 10.1136/bmjopen-2023-080555 (PMC11574392; doi:10.1136/bmjopen-2023-080555), 2024-11-12
Supplement: bmjopen-14-11-s001.pdf [file bmjopen-14-11-s001.pdf]

## Supplementary Table 1: LIA alone vs Combined intervention Outcomes

| Outcome                      | # studies | # people*      | Estimate                | I <sup>2</sup> |
|------------------------------|-----------|----------------|-------------------------|----------------|
| <b>Pain at rest</b> §        |           |                |                         |                |
| 12 hours                     | 5         | 450 (223, 227) | 0.799 (0.115, 1.483)    | 91.6           |
| 24 hours                     | 10        | 859 (427, 432) | 0.423 (0.202, 0.645)    | 60.9           |
| 48 hours                     | 10        | 804 (399, 405) | 0.220 (-0.027, 0.468)   | 66.7           |
| 72 hours                     | 3         | 252 (126, 126) | 0.352 (0.017, 0.687)    | 43.1           |
| <b>Pain on movement</b> §    |           |                |                         |                |
| 12 hours                     | 4         | 380 (187, 193) | 0.941 (0.229, 1.653)    | 90.6           |
| 24 hours                     | 8         | 626 (319, 307) | 0.372 (0.010, 0.734)    | 78.7           |
| 48 hours                     | 7         | 585 (290, 295) | 0.541 (0.117, 0.964)    | 83.8           |
| 72 hours                     | 2         | 150 (75, 75)   | 0.345 (-0.233, 0.923)   | 67.2           |
| <b>Morphine consumption</b>  |           |                |                         |                |
| 12 hours                     | 3         | 363 (189, 174) | 2.958 (-3.881, 9.796)   | 63.4           |
| 24 hours                     | 8         | 681 (339, 342) | 1.058 (-0.087, 2.202)   | 74.0           |
| 48 hours                     | 5         | 489 (243, 246) | 0.194 (-0.516, 0.904)   | 30.8           |
| 72 hours                     | 3         | 252 (126, 126) | 2.442 (-2.393, 7.277)   | 91.5           |
| <b>Distance walked</b>       |           |                |                         |                |
| 12 hours                     | 1         | 130 (62, 68)   | -2.340 (-12.917, 8.237) | -              |
| 24 hours                     | 3         | 319 (156, 163) | -0.228 (-3.699, 3.243)  | 0.00           |
| 48 hours                     | 2         | 189 (94, 95)   | 0.844 (-4.272, 5.960)   | 0.00           |
| 72 hours                     | 1         | 90 (45, 45)    | 1.690 (-5.639, 9.019)   | -              |
| <b>Range of movement</b>     |           |                |                         |                |
| 24 hours                     | 4         | 380 (187,193)  | -5.190 (-5.547, -4.833) | 0.00           |
| 48 hours                     | 3         | 250 (125, 125) | -4.128 (-6.305, -1.951) | 29.4           |
| 72 hours                     | 2         | 150 (75, 75)   | 0.219 (-4.177, 4.614)   | 41.5           |
| 1 month                      | 1         | 102 (51, 51)   | -3.000 (-8.489, 2.489)  | -              |
| 6 months                     | 1         | 60 (30, 30)    | -0.800 (-3.053, 1.453)  | -              |
| 12 months                    | 1         | 60 (30, 30)    | -1.00 (-3.328, 1.328)   | -              |
| <b>Length of stay (days)</b> | 6         | 452 (223, 229) | 0.000 (-0.000, 0.000)   | 60.4           |

\*Total (number in LIA alone, number in combined)

Estimates are mean difference (95% confidence interval) unless otherwise stated

§Estimates are standardised mean difference (95% confidence interval)

## Supplementary Table 2: ACB alone vs Combined intervention outcomes

| Outcome                                     | # studies | # people*      | Estimate                  | I <sup>2</sup> |
|---------------------------------------------|-----------|----------------|---------------------------|----------------|
| <b><i>Pain at rest</i></b> <sup>§</sup>     |           |                |                           |                |
| 12 hours                                    | 2         | 140 (70, 70)   | 0.633 (0.256, 1.009)      | 13.1           |
| 24 hours                                    | 5         | 380 (189, 191) | 0.627 (0.421, 0.834)      | 0.00           |
| 48 hours                                    | 4         | 340 (169, 171) | 0.160 (-0.053, 0.374)     | 0.00           |
| 72 hours                                    | 1         | 104 (53, 51)   | 0.840 (0.439, 1.241)      | -              |
| <b><i>Pain on movement</i></b> <sup>§</sup> |           |                |                           |                |
| 12 hours                                    | 2         | 140 (70, 70)   | 0.761 (0.418, 1.105)      | 0.00           |
| 24 hours                                    | 4         | 276 (136, 140) | 0.806 (0.348, 1.265)      | 68.2           |
| 48 hours                                    | 3         | 236 (116, 120) | 0.664 (0.402, 0.927)      | 0.00           |
| <b><i>Morphine consumption</i></b>          |           |                |                           |                |
| 12 hours                                    | 2         | 144 (73, 71)   | 2.410 (-5.224, 10.044)    | 70.5           |
| 24 hours                                    | 3         | 240 (119, 121) | 5.937 (-2.411, 14.286)    | 81.1           |
| 48 hours                                    | 2         | 200 (99, 101)  | 8.107 (-7.800, 24.015)    | 90.7           |
| 72 hours                                    | 1         | 104 (53, 51)   | 8.700 (2.033, 15.367)     | -              |
| <b><i>Distance walked</i></b>               |           |                |                           |                |
| 24 hours                                    | 1         | 96 (46, 50)    | -18.00 (-25.398, -10.602) | -              |
| 48 hours                                    | 1         | 96 (46, 50)    | -11.800 (-25.414, 1.814)  | -              |
| <b><i>Range of movement</i></b>             |           |                |                           |                |
| 24 hours                                    | 1         | 100 (50, 50)   | -3.800 (-4.371, -3.229)   | -              |
| 48 hours                                    | 1         | 100 (50, 50)   | -1.800 (-2.208, -1.392)   | -              |
| 1 month                                     | 1         | 104 (53, 53)   | -5.000 (-10.211, 0.211)   | -              |
| <b><i>Length of stay (days)</i></b>         | 3         | 244 (123, 121) | 0.348 (0.107, 0.589)      | 0.00           |

\*Total (number in ACB alone, number in combined)

Estimates are mean difference (95% confidence interval) unless otherwise stated

§Estimates are standardised mean difference (95% confidence interval)
