# Supplementary material for: Pain control post total knee replacement in patients given local infiltrative analgesia combined with adductor canal block compared to either modality alone: a systematic review and meta-analysis
Source: PubMed Central journal article supplement — BMJ Open. 2024 Nov 12;14(11):e080555. doi: 10.1136/bmjopen-2023-080555 (PMC11574392; doi:10.1136/bmjopen-2023-080555), 2024-11-12

Supplementary Figure 1: Pain on Movement (LIA vs Combined)

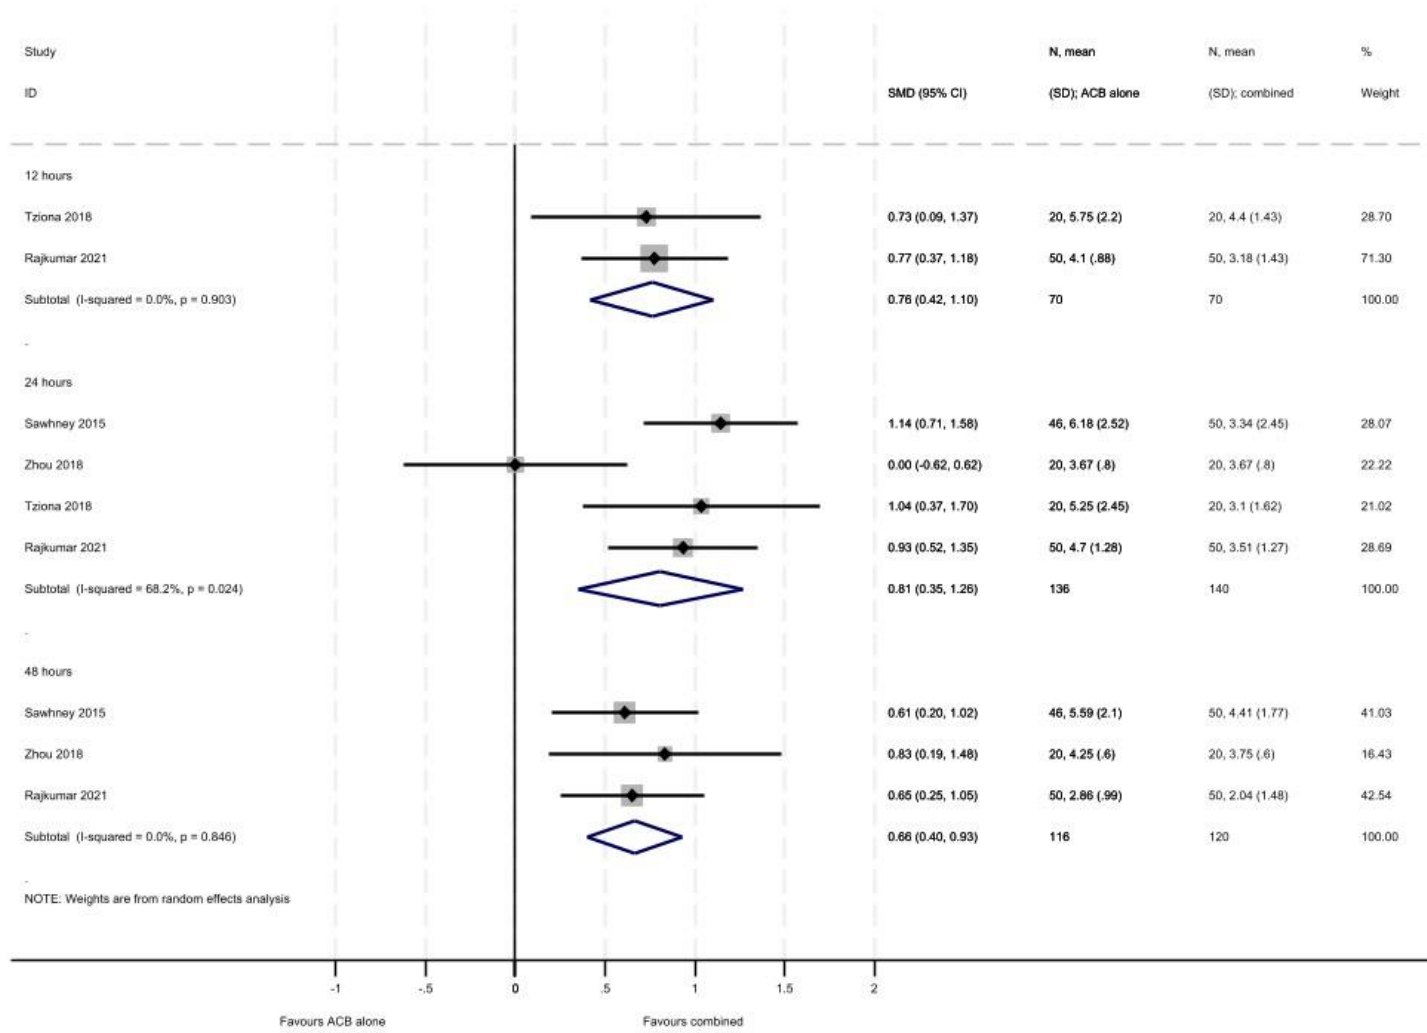

Supplementary Figure 2: Pain on Movement (ACB vs Combined)

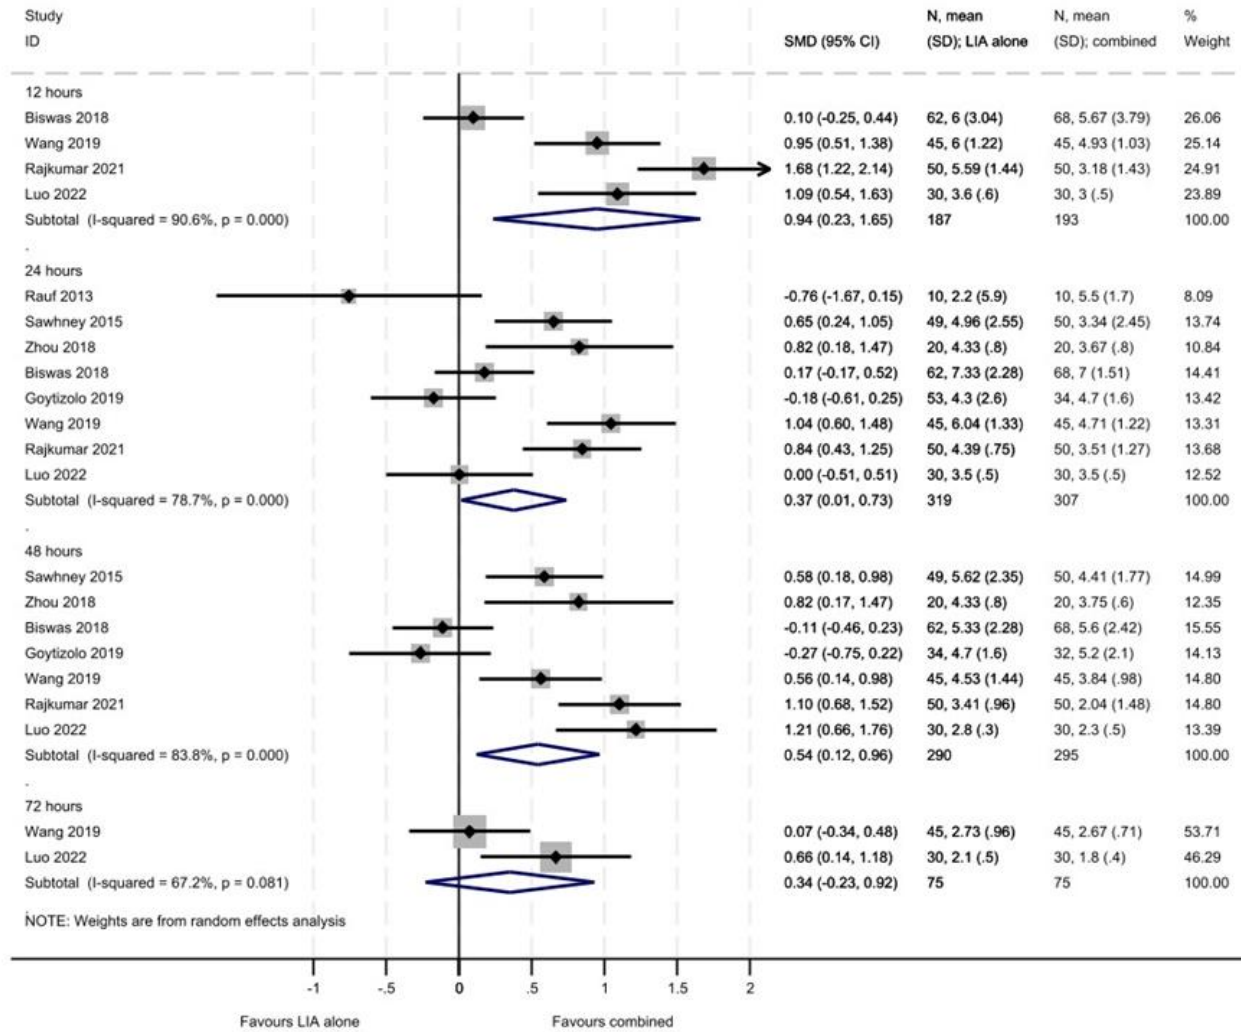

Supplement: bmjopen-14-11-s002.pdf [file bmjopen-14-11-s002.pdf]
